# Supplementary material for: Hypoxia-induced microRNA-10b-3p promotes esophageal squamous cell carcinoma growth and metastasis by targeting TSGA10
Source: publisher site journal article supplement (doi:10.18632/aging.102462), 2019-11-26
Supplement: Supplementary file [file aging-v11i22-102462-supplementary-material-SD1.pdf]

## SUPPLEMENTARY FIGURE

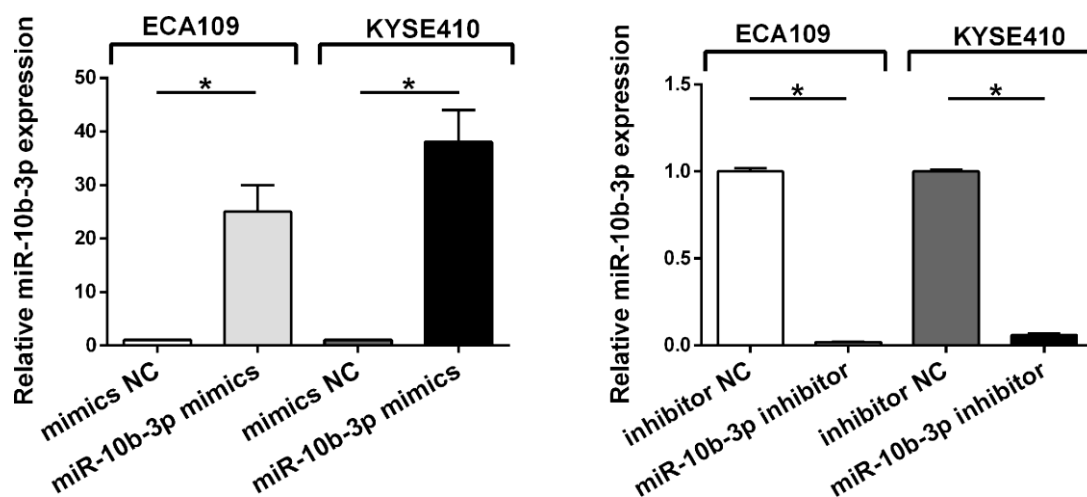

Supplementary Figure 1. Expression of miR-10b-3p in ESCC cells after transfection was measured using qRT-PCR.
